# Supplementary material for: A review on quantitation-related factors and quantitation strategies in mass spectrometry imaging of small biomolecules
Source: Royal Society of Chemistry journal article supplement (doi:10.1039/d2ay01257j), 2022-01-01
Supplement: d2ay01257j4.pdf [file d2ay01257j4.pdf]

Search

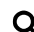

Request for reproduction permission of a "ACS Author Choice/ACS Editor's Choice" article

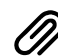

Type your message here...

Send

**Keith Pearl**

🕒 9h ago ● Additional comments

Dear Qian,

Thank you for contacting ACS Publications Support.  
Your permission requested is granted and there is no fee for this reuse. In your planned reuse, you must cite the ACS article as the source, add this direct link <https://pubs.acs.org/doi/10.1021/acs.analchem.0c03186>, and include a notice to readers that further permissions related to the material excerpted should be directed to the ACS.

This information has also been sent to you via email. If you have not received the email, Please check your spam folder and also make sure to white list the email address [support@services.acs.org](mailto:support@services.acs.org).

If you need further assistance, please let me know.

Best regards,  
Keith Pearl

~~~~~  
Keith Pearl  
ACS Publications Support  
Customer Services & Information  
Website: <https://acs.service-now.com/acs>  
Email: [support@services.acs.org](mailto:support@services.acs.org)  
Phone: 800-227-9919 | 202-872-(HELP) 4357

**Guest**

🕒 4d ago

CSCSI0013817 Created

Actions

Reject Solution

Attachments

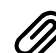

Drop  
files here

Start

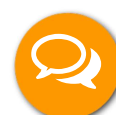

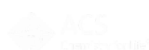

ACS | C&EN | Publications | CAS

1155 Sixteenth Street, NW, Washington, DC 20036, USA, [service@acs.org](mailto:service@acs.org), 1-800-333-9511 (US and Canada), 614-447-3776 (outside North America)

Copyright © 2021 American Chemical Society
